# Supplementary material for: Integrated bioinformatics screening and experimental validation: construction of a LUAD prediction model based on Treg-related genes
Source: PeerJ journal article supplement (doi:10.7717/peerj.20287), 2025-11-11
Supplement: figure8rawdata.xlsx [file figure8rawdata.xlsx]

## Sheet: wb bar graph raw data
	BEAS-2B	BEAS-2B	BEAS-2B	A549	A549	A549
SCN9A	1.91834	1.48507	1.16753	0.85379	0.993714	0.882678
CD25	1.18074	1.07714	0.468925	1.95736	2.18884	0.966692
CD4	0.444284	0.46298	0.5797	1.11285	0.929948	0.953439
FOXP3	0.718826	0.602072	0.58435	1.21127	1.19048	0.961654
GAPDH	1	1	1	1	1	1

## Sheet: Correlation coefficient Scatter
ID	risk	SCN9A	LTB4R2	FER	B3GALT1	ADARB2	N6AMT1
GSM1032881	0.125476	7.62816	4.45632	6.37945	3.41626	4.37674	6.17871
GSM1032882	0.22716	5.56872	3.87123	6.21266	2.87011	4.71503	5.55033
GSM1032884	0.561433	5.42459	4.86373	6.37793	3.55797	5.05494	6.1829
GSM1032885	-0.0859915	5.51979	4.45933	7.59697	2.95828	4.12383	7.09578
GSM1032886	0.361958	6.25124	4.89344	6.52212	3.74903	4.14778	6.13279
GSM1032887	0.663192	4.14447	4.83042	6.04731	3.09067	4.95148	5.75851
GSM1032889	0.261192	5.64015	4.89035	6.88442	4.07362	3.95571	7.2234
GSM1032891	0.93206	4.76001	6.06328	5.73701	3.73352	4.6863	6.46982
GSM1032892	0.239565	5.26268	4.75727	6.85094	3.3458	4.25976	6.79514
GSM1032893	0.401996	6.00999	4.75727	6.11683	3.45022	4.64963	6.42241
GSM1032894	0.331722	4.48174	5.13709	7.04261	2.68497	4.97345	7.16609
GSM1032895	-0.0693467	7.08544	4.15782	6.98629	3.24437	4.48784	6.8154
GSM1032898	0.256786	5.73558	4.87377	6.57224	3.26235	4.34139	6.83664
GSM1032899	0.152346	6.42415	4.47505	6.98041	3.78479	4.29143	6.64287
GSM1032901	0.414354	5.75424	4.29033	6.29693	3.39028	4.9963	5.77154
GSM1032902	0.505146	5.89931	4.39049	5.93612	3.71847	4.96544	5.96496
GSM1032903	0.395803	5.70332	4.86265	7.39106	3.85758	4.97786	6.54088
GSM1032904	0.859111	5.55085	5.21774	5.44255	3.87996	5.51322	6.50584
GSM1032905	0.235913	6.16027	4.6945	6.56536	3.57815	3.93594	6.24798
GSM1032906	0.650085	4.02199	4.88433	6.48836	3.71787	4.5328	5.9187
GSM1032907	0.600982	3.39096	4.64547	6.4702	3.47619	4.80974	6.36622
GSM1032909	0.395392	7.95055	5.1876	6.30905	3.23718	5.18764	6.10667
GSM1032910	0.203493	5.45761	4.45706	6.75614	3.29119	4.35631	6.51063
GSM1032911	0.537882	4.59817	4.62073	6.30321	3.58967	4.68233	6.1199
GSM1032913	0.563905	5.04085	4.79574	6.1821	3.65473	4.49254	5.89201
GSM1032914	0.466241	5.83342	4.80091	6.24022	3.6207	4.45477	5.95162
GSM1032915	0.331081	5.1835	4.33153	6.03787	2.96334	4.8316	6.3936
GSM1032919	0.557459	5.63955	4.98415	6.17918	3.20808	5.26362	6.28965
GSM1032920	0.476187	5.11935	4.57062	5.95292	3.66013	4.52898	6.42884
GSM1032925	0.291857	5.55194	4.21235	6.65011	3.57595	4.55485	6.04274
GSM1032927	0.0673306	7.36624	4.26411	6.47632	4.09693	4.4342	7.45884
GSM1032929	0.351204	8.51275	4.31479	4.69932	4.25842	3.82558	5.75039
GSM1032930	0.164366	6.98212	4.31269	6.36777	3.7519	4.70673	7.02676
GSM1032931	0.0570218	4.9928	4.27489	6.18346	3.03633	4.82848	8.63279
GSM1032932	0.345293	5.96742	4.78507	6.71267	3.7527	4.17813	6.09904
GSM1032935	0.0987538	6.2557	4.25605	6.4436	3.23139	4.74001	7.18265
GSM1032937	0.210981	5.04576	4.20634	5.89092	3.11398	3.85526	6.26721
GSM1032938	0.0617087	4.56531	3.89819	7.21828	3.11165	4.67579	6.89254
GSM1032939	0.0190856	8.38167	4.80221	4.98754	3.00676	3.85335	7.41634
GSM1032940	0.168685	6.52067	4.96804	8.14814	3.51135	3.73057	4.9087
GSM1032944	0.207993	4.93825	4.2636	7.4291	2.93457	5.12937	6.26354
GSM1032945	0.586871	5.04176	4.96248	6.37969	3.59406	4.75614	6.08848
GSM1032946	0.306539	6.53654	4.51358	6.01735	3.77793	4.89211	7.27514
GSM1032948	0.543453	4.10608	5.83438	6.7759	2.61425	3.98157	5.8915
GSM1032949	0.175521	6.19265	4.46086	6.96157	4.21007	4.17673	7.09062
GSM1032950	0.271929	7.21948	5.42042	6.64999	2.89901	4.68586	6.54722
GSM1032951	0.32187	9.20091	5.12552	5.36635	3.55118	5.17522	7.17545
GSM1032952	0.29357	4.67124	4.68236	6.61083	3.90946	4.0416	7.44621
GSM1032953	0.22526	5.76357	4.32228	7.4597	4.49084	4.3569	6.83064
GSM1032954	0.421262	6.785	4.87673	5.8932	4.0236	4.15711	6.3432
GSM1032955	0.132657	5.20813	4.68815	6.96157	3.11651	3.7266	6.37118
GSM1032956	-0.00312508	7.78652	4.87377	6.11963	3.93324	3.25047	7.44845
GSM1032957	0.163049	6.35026	4.1514	6.99125	4.23624	4.46719	6.8711
GSM1032958	0.545852	6.01196	4.56375	6.21258	4.95677	4.84123	7.25147
GSM1032959	0.690825	5.11882	5.20105	7.00901	4.00023	5.1944	6.1542
GSM1032961	0.0958602	8.43463	3.9206	6.48912	3.70415	5.54585	6.69516
GSM1032962	0.119035	5.32218	4.49267	6.80986	2.974	4.44926	6.978
GSM1032963	0.269531	8.1842	5.35229	6.31817	3.51475	4.6827	7.00145
GSM1032964	0.56964	4.82926	5.11201	6.25114	4.3389	4.271	7.26599
GSM1032968	0.324746	6.46937	4.73071	6.73051	3.61384	4.74773	6.35577
GSM1032969	0.361786	4.70803	4.1007	5.87676	3.66559	4.46024	6.74389
GSM1032970	0.563673	4.55537	4.87803	6.32601	3.10752	4.76951	5.82784
GSM1032973	0.267632	5.76233	4.23761	6.05283	3.55104	4.78226	7.09176
GSM1032975	0.0663634	8.01757	4.70443	7.78312	3.409	5.08896	6.27347
GSM1032976	0.571724	5.86587	5.62705	6.31253	3.17878	4.93572	6.63208
GSM1032977	0.172	6.50866	4.29351	6.40793	3.76062	4.57234	7.05784
GSM1032978	-0.0158066	7.34309	4.55671	6.20046	3.8145	3.3454	7.11598
GSM1032980	0.366147	4.89412	4.08909	6.27114	3.46281	4.66429	6.08357
GSM1032981	0.106948	6.46434	4.61769	6.8395	3.39148	4.41296	7.01531
GSM1032982	0.513581	4.86692	4.7193	6.5854	3.16439	5.3717	6.32805
GSM1032983	0.387972	5.26578	4.88478	6.60391	3.43344	4.28371	6.26096
GSM1032984	0.415853	5.26056	4.47505	6.14178	3.3437	4.54434	5.96898
GSM1032985	0.315659	6.19616	5.05089	6.46904	3.06097	4.75265	6.74985
GSM1032987	0.162118	6.93577	4.53259	5.87564	4.14994	3.93447	7.58821
GSM1032988	0.505372	5.74714	5.07098	6.04387	3.69056	4.2149	6.22078
GSM1032990	0.360585	6.34357	4.697	6.86686	3.89574	4.57902	6.1164
GSM1032991	0.502895	4.99325	4.45922	6.45224	3.84073	5.06868	6.53984
GSM1032993	0.165905	7.07834	4.4612	6.06795	3.42345	4.02228	6.12998
GSM1032994	0.375208	5.76112	4.66425	5.85116	2.7856	4.51098	5.75851
GSM1032995	0.151035	5.92832	4.61602	6.7759	3.55371	4.2566	7.14141
GSM1032996	0.38841	6.70888	4.6125	5.84092	3.66585	4.6755	6.39497
GSM1032997	0.0177361	8.19508	4.89738	7.47474	4.36417	4.67124	8.11806
GSM1032998	0.494386	6.92534	5.11247	5.8646	3.76928	4.85449	6.73057
GSM1032999	0.512643	5.18282	4.88212	6.64563	4.15819	4.11376	6.08171
GSM1033000	0.338156	4.70981	4.44724	6.15706	3.07602	3.75056	5.44111
GSM1033001	0.681642	3.84032	5.02762	6.38553	3.87423	4.84409	6.86284
GSM1033003	0.308188	5.29048	4.59888	6.69363	3.28433	5.00034	7.01129
GSM1033004	0.394539	6.41255	4.64468	6.67671	3.87297	5.24752	6.79451
GSM1033005	0.231247	7.47954	4.66102	5.98895	3.47992	4.63075	6.71223
GSM1033006	0.352995	4.91838	3.81942	6.55584	3.29891	5.29822	5.95704
GSM1033007	0.147929	5.55213	4.62952	7.10028	2.9694	4.19627	6.15202
GSM1033008	0.39313	5.97909	4.75608	6.19454	3.43031	4.82179	6.63971
GSM1033010	0.40928	5.01803	4.53543	5.04705	3.31989	4.17739	7.01147
GSM1033011	0.188028	6.57091	4.57428	6.06451	3.20089	4.67697	7.13708
GSM1033012	0.456106	4.53248	4.81998	6.98553	3.17551	4.77962	5.99134
GSM1033013	0.563772	5.43619	4.9862	6.62531	3.18757	5.27309	5.8721
GSM1033014	0.601984	4.60309	4.88671	5.9462	3.57322	4.66734	6.47303
GSM1033015	0.656241	6.00168	4.8883	6.15522	4.23445	4.91981	6.08865
GSM1033016	0.105538	6.87049	4.19553	6.18506	3.34839	4.73325	7.00475
GSM1033017	0.190855	6.11766	4.51676	6.00067	3.75023	3.85335	7.07716
GSM1033018	0.312674	7.61712	4.2897	6.63447	4.94508	4.49849	6.46798
GSM1033019	0.434583	5.82545	4.91185	6.21218	3.14575	4.49922	5.82601
GSM1033020	0.0861564	5.79119	5.01213	6.63759	2.91493	3.64574	6.91969
GSM1033021	0.256966	4.69096	4.01742	6.39629	3.31643	4.79975	6.82596
GSM1033022	0.115508	7.78637	3.75555	6.08939	3.35132	4.60584	5.29699
GSM1033023	-0.0293599	8.23992	4.85005	7.56897	3.24604	4.4893	6.35127
GSM1033024	0.280094	4.48409	4.36223	7.22771	3.68004	5.09792	7.49701
GSM1033025	0.53329	6.51738	4.68559	4.38758	4.15726	4.14572	7.11633
GSM1033029	0.402793	5.58307	4.45541	6.36465	3.73578	4.91768	6.65314
GSM1033030	0.610241	5.04916	5.15735	6.85366	3.35672	4.89211	5.57895
GSM1033031	0.58284	4.99189	6.17352	7.03805	2.95385	4.32442	6.27169
GSM1033032	0.637788	4.5239	4.51381	5.47015	3.61398	5.12974	6.73642
GSM1033034	0.396004	5.33937	4.56744	6.55088	3.56376	4.80813	6.49427
GSM1033035	0.218671	7.11687	4.10765	5.56866	4.10991	4.34569	6.99924
GSM1033036	0.069382	5.91974	4.44616	7.02749	2.61355	4.86	6.64206
GSM1033037	0.404963	4.13608	4.62998	6.45488	3.04012	5.08749	7.15857
GSM1033038	0.149456	3.98346	4.3632	6.31289	2.80398	4.74732	8.18895
GSM1033039	-0.119637	8.28061	3.82464	6.24634	3.64121	3.83958	6.19845
GSM1033040	0.614867	4.69096	5.69046	6.8785	3.48372	4.50609	6.4922
GSM1033041	0.400577	7.15767	4.73213	5.70613	3.44942	5.01063	6.49599
GSM1033043	0.185695	7.08575	4.59576	7.1634	3.70315	4.78792	6.48012
GSM1033044	0.0935383	6.62218	4.4019	6.23682	3.30045	4.35477	7.04154
GSM1033045	0.354288	5.39218	4.66834	6.54208	3.10945	4.66609	6.13509
GSM1033046	0.258136	5.37979	4.39049	6.86406	3.29971	4.90894	6.64671
GSM1033047	0.0643696	6.07127	4.21074	6.76394	2.93557	4.50033	6.37652
GSM1033049	0.199634	7.57338	4.73423	6.7907	3.96334	4.86375	7.19232
GSM1033050	-0.109614	6.20761	4.72225	7.97535	3.33421	4.12801	7.44303
GSM1033051	0.0373841	5.03836	4.01986	7.59393	3.94635	4.3134	7.29922
GSM1033052	0.424201	4.54268	4.30437	6.48916	3.20954	5.06361	6.22795
GSM1033053	0.452255	5.88197	4.21428	5.57874	3.79472	4.7902	6.33678
GSM1033054	0.499577	4.83836	4.98291	6.48884	3.39728	4.55992	6.31261
GSM1033055	0.407779	5.47163	4.65988	6.47304	3.95182	4.49526	6.71209
GSM1033056	0.343437	4.54219	4.36138	7.16672	3.50869	4.60702	6.05439
GSM1854797	0.297611	4.48186	4.36246	6.94065	3.56205	4.20668	6.25617
GSM1854798	0.545438	4.46431	4.28694	5.05006	3.40757	4.49356	6.37023
GSM1854799	0.181944	6.5828	4.43758	6.75329	2.89765	4.98034	6.10034
GSM1854800	0.176428	7.38672	4.45525	6.12032	3.31418	4.17173	5.78801
GSM1854801	-0.041315	6.21821	4.0568	7.19873	3.71607	3.95448	6.74646
GSM1854802	0.141231	6.33592	4.78761	6.99051	2.89394	4.07357	5.77857
GSM1854803	0.217937	6.06053	4.53572	6.51583	3.67183	4.10122	6.58131
GSM1854804	0.233989	5.96538	4.95649	6.7585	3.18754	4.18481	6.47846
GSM1854805	0.424615	3.7916	4.63126	6.06578	3.14965	4.23548	6.6666
GSM1854806	0.0128977	6.06458	3.91165	6.37667	4.01228	3.84867	7.34433
GSM1854807	0.194824	5.58319	4.27795	5.98328	2.98927	4.03298	6.10153
GSM1854808	0.292456	4.71104	4.481	5.91234	3.59856	4.35072	7.78079
GSM1854809	0.232544	5.87102	4.24571	6.29614	3.58883	4.38572	6.54508
GSM1854810	0.274849	6.18597	4.30216	6.46026	3.36638	4.6297	5.8965
GSM1854811	0.360989	5.56662	4.57803	5.96991	3.40757	4.21525	6.22995
GSM1854812	0.335838	5.57496	4.61055	6.07301	3.66553	4.83812	7.6361
GSM1854813	0.29063	5.8214	4.45147	6.0899	3.50587	4.8009	7.20047
GSM1854814	0.308794	4.18817	4.74025	6.70473	3.2337	4.127	6.80042
GSM1854815	0.48287	5.1252	4.49652	6.28345	3.50351	4.70828	5.86531
GSM1854816	0.494984	6.41774	4.50624	5.79033	3.88795	5.07201	6.46007
GSM1854817	0.0664824	7.24065	4.72661	6.44933	2.8025	4.61775	6.83701
GSM1854818	0.551347	6.19715	4.84299	6.29754	3.28791	5.21738	5.5644
GSM1854819	0.657859	4.69498	4.74485	5.76119	3.72944	4.25797	5.52865
GSM1854820	0.171871	4.163	4.05009	6.37479	2.84017	3.91005	6.05916
GSM1854821	0.213394	6.30139	4.66351	6.91599	3.64776	4.19483	6.33763
GSM1854822	0.214126	5.57544	4.67292	6.11322	3.31505	3.87148	6.84861
GSM1854823	-0.0709523	7.52276	4.22041	6.49163	3.14837	4.3671	6.87394
GSM1854824	0.530458	5.07533	5.07497	6.87137	3.56166	4.70291	6.07734
GSM1854825	0.291317	4.62852	4.19569	6.54212	3.4772	4.22351	6.21325
GSM1854826	0.418073	5.66476	4.61935	6.01484	4.27076	4.3441	7.18387
GSM1854827	0.0246332	7.69524	4.61787	7.42517	2.7769	5.0628	6.11082
GSM1854828	0.416695	6.46517	5.07939	5.38454	3.39504	4.08038	6.55217
GSM1854829	0.259763	6.39368	4.99474	7.16525	3.32587	4.70599	6.49809
GSM1854830	0.461539	4.29245	4.65246	6.4207	3.78242	4.8032	7.36717
GSM1854831	0.0919102	6.40224	3.95529	6.30972	2.76403	5.24078	6.68425
GSM1854832	0.417901	5.69403	4.57054	5.70286	3.5287	4.57758	6.63735
GSM1854833	0.230562	5.48861	4.10628	5.70769	3.16415	4.85085	7.24892
GSM1854834	0.260205	5.41075	4.42566	6.54167	3.88255	4.22475	6.95381
GSM1854835	0.198278	5.54757	4.35856	6.07508	3.40383	4.11582	6.89095
GSM1854836	0.357662	5.53361	4.83065	5.75333	2.85645	4.8309	7.06835
GSM1854837	0.266016	5.05817	4.47019	6.23348	3.5961	4.03541	6.9128
GSM1854838	0.256727	4.10402	3.92865	6.78813	2.76812	4.96883	6.06416
GSM1854839	0.542874	6.54611	4.61005	5.40103	4.31514	4.84167	6.92959
GSM1854840	0.56079	5.46441	4.576	6.26529	3.51073	5.24935	5.9133
GSM1854841	0.659048	3.26199	3.9	6.49715	3.52956	6.2483	6.55518
GSM1854842	0.558446	5.75624	4.7281	5.03478	3.28006	4.96318	6.66303
GSM1854843	0.430822	4.88699	4.27193	6.20885	3.7924	5.05518	7.02622
GSM1854844	0.243739	8.28893	4.69463	6.31441	3.42689	5.33059	6.60465
GSM1854845	0.403777	6.09026	4.68367	6.31859	3.51276	4.91268	6.43444
GSM1854846	-0.0541258	5.86819	3.49623	6.85694	3.34251	4.4765	6.55368
GSM1854847	0.387024	5.39128	4.2152	6.64859	3.77758	5.3139	6.74349
GSM1854848	0.00600603	6.59388	3.95618	6.86969	3.01632	5.02759	6.70124
GSM1854849	0.329901	7.12704	3.83902	5.99872	4.27278	5.27059	6.58538
GSM1854850	0.115093	6.32209	4.37907	8.02659	3.71766	5.06233	6.63281
GSM1854851	-0.143068	5.94071	3.59425	8.90364	3.57171	4.94554	6.11959
GSM1854852	-0.115994	5.4287	2.95828	6.60417	4.14536	4.19397	7.40932
GSM1854853	0.395132	5.49141	4.12796	5.78643	3.85996	4.26736	6.06088
GSM1854854	0.0651234	5.41306	3.75381	7.3132	3.80776	4.81724	7.07422
GSM1854855	0.289044	3.79725	3.74421	7.12714	2.83914	4.91687	5.30807
GSM1854856	0.322682	5.61126	4.1854	7.39967	3.60748	5.29133	5.92012
GSM1854857	0.246435	4.84649	3.39168	7.05097	3.86231	4.97657	5.87269
GSM1854858	0.198293	6.94958	4.26246	6.83235	3.30235	4.80953	5.61848
GSM1854859	0.349114	5.54573	4.40987	5.89021	3.48051	4.68723	6.86713
GSM1854860	-0.22486	7.25963	3.61464	6.84507	3.41195	4.33447	7.08577
GSM1854861	0.628012	5.57733	4.33857	7.07997	5.51249	4.80414	6.24435
GSM1854862	0.607804	5.61661	4.28365	5.49012	3.98871	5.31053	6.50122
GSM1854863	0.681322	7.12134	4.76004	6.50546	4.32522	6.10778	6.19186
GSM1854864	0.686417	4.80491	4.80248	6.10029	3.5039	5.79079	6.74847
GSM1854865	0.154782	8.75462	4.5101	6.34057	3.21351	5.56012	6.59952
GSM1854866	0.535556	5.30438	4.75952	6.36242	3.25996	5.00849	5.7869
GSM1854867	0.234775	6.39126	4.29063	6.53585	3.30656	5.42504	6.98963
GSM1854868	0.293721	7.8753	5.31643	6.74807	3.27115	5.11615	6.71696
GSM1854869	0.263473	6.0729	4.29927	7.01226	3.8891	4.72743	6.36285
GSM1854870	0.372204	6.60656	4.56322	6.69165	3.93766	4.30214	5.43081
GSM1854871	-0.171011	6.38534	4.66791	6.57342	2.82596	4.02109	8.38509
GSM1854872	0.55795	5.89217	4.5841	5.27737	3.66867	4.61025	6.09159
GSM1854873	0.545807	6.00773	4.80655	6.48424	4.4015	4.67626	6.37333
GSM1854874	0.286332	7.47223	5.19764	5.83407	3.21823	4.62753	7.1111
GSM1854875	0.138216	6.06309	4.4979	7.011	3.40213	4.53081	6.8035
GSM1854876	0.403393	5.80307	4.28597	5.37476	2.99188	4.653	5.7836
GSM1854877	0.64171	6.42336	5.06606	5.18183	3.37563	4.68677	5.74054
GSM1854878	0.747213	3.60339	4.92781	6.16217	3.42937	4.54833	5.47212
GSM1854879	0.0420992	7.51774	4.42994	6.4175	3.3112	4.36026	6.67618
GSM1854880	0.476595	7.20296	4.81067	6.02315	4.17909	5.15117	6.91671
GSM1854881	0.392789	6.21437	5.02233	5.90756	2.95926	5.00756	6.87874
GSM1854882	-0.040682	7.27802	4.72713	7.78011	3.53322	4.11377	6.58183
GSM1854883	1.22458	3.0361	5.10931	5.46804	3.98871	7.12297	7.51965
GSM1854884	0.520935	5.29895	4.47421	5.73541	3.82251	4.45674	6.11901
GSM1854885	0.105345	7.36553	4.32128	6.19993	2.9986	4.73632	6.35385
GSM1854886	0.364991	6.44563	5.05197	6.43314	3.52196	4.87111	7.05156
GSM1854887	0.0722053	5.78792	4.23126	7.25103	3.36469	4.30891	6.38668
GSM1854888	0.253341	7.20337	4.4533	5.85402	3.30191	4.73954	6.3596
GSM1854889	0.352782	5.88119	4.19427	5.90514	3.47846	4.3768	5.70321
GSM1854890	0.330113	7.10598	4.8296	6.32182	3.35472	4.55314	5.83682
GSM1854891	0.503282	4.83479	5.03036	7.01954	3.43944	4.60363	5.90431
GSM1854892	0.180539	6.55767	4.9049	6.76354	3.14327	4.39852	6.60407
GSM1854893	0.394128	5.65783	4.85486	6.89088	3.03443	5.10827	6.09159
GSM1854894	0.192071	6.29694	3.61506	5.69114	3.97403	4.37887	6.55368
GSM1854895	0.664959	6.12822	5.21972	6.73458	3.5215	5.61644	5.83901
GSM1854896	0.658296	4.89002	5.08795	5.83062	3.64939	4.46733	6.15861
GSM1854897	0.636255	4.75692	4.78547	5.97785	3.79663	4.63098	6.11959
GSM1854898	0.385101	3.4478	4.70271	6.81048	3.43249	4.53769	7.39647
GSM1854899	0.290653	6.2909	4.5921	6.48651	3.46745	4.50364	6.21048
GSM1854900	0.210308	5.32223	4.22506	6.68986	3.64694	4.40194	6.76193
GSM1854901	0.173838	6.58325	3.98498	5.90124	3.5047	4.74906	6.80891
GSM1854902	0.0897946	7.53946	4.73171	6.12647	3.41279	4.4099	7.41601
GSM1854903	0.24896	5.13103	4.20954	6.69388	3.48832	4.6983	6.72633
GSM1854904	0.489316	7.4419	4.9979	5.75098	3.91242	4.73632	6.33602
GSM1854905	0.533864	5.0444	4.07248	5.42554	4.226	4.51131	6.42871
GSM1854906	0.514036	5.72767	4.85537	7.29027	4.2093	5.39275	6.7475
GSM1854907	0.313208	6.01309	4.18864	5.43669	3.73021	4.49668	6.99337
GSM1854908	0.463678	5.78504	4.56322	6.55195	3.45286	4.70202	5.27837
GSM1854909	0.223669	6.03394	4.57754	7.03959	3.55223	4.56791	6.5198
GSM1854910	0.54768	4.7561	4.27332	5.81556	3.53322	5.01748	6.16306
GSM1854911	0.736259	3.26043	5.31486	5.85924	3.71325	4.66225	7.51468
GSM1854912	1.04583	4.72193	4.74225	5.14836	4.82308	5.36925	6.16695
GSM1854913	0.562549	5.02117	4.56467	5.80781	3.19487	4.68061	5.45633
GSM1854914	0.227479	8.01437	4.95901	6.10705	3.35173	4.68632	6.69224
GSM1854915	0.562092	6.15288	4.60596	5.3619	4.10759	4.78827	6.71502
GSM1854916	0.437446	5.17677	4.23362	6.21788	3.32628	5.0271	5.93416
GSM1854917	0.602977	5.74573	5.23001	6.3863	3.92495	4.4328	5.99837
GSM1854918	0.205385	6.49829	4.97494	6.7847	3.40592	4.2338	6.71993
GSM1854919	-0.0609662	5.91661	3.96771	6.83915	3.33585	3.9868	6.83988
GSM1854920	0.212573	6.56451	4.09227	6.25306	3.66985	4.66993	6.45474
GSM1854921	0.485893	3.28536	4.97859	6.65345	3.56123	4.41713	7.43351
GSM1854922	0.291378	5.06722	4.41512	6.40324	3.25564	4.72292	6.8476
GSM1854923	0.470698	5.43994	4.53572	6.63376	3.65537	4.87111	5.86868
GSM1854924	0.31944	5.53598	4.50179	6.26674	3.58226	4.13806	6.2627
GSM1854925	0.199361	9.04612	4.33184	6.28109	3.78927	5.04102	5.85845
GSM1854926	0.1972	4.15178	4.13772	6.83829	3.22592	4.43325	6.8163
GSM1854927	0.547359	4.61809	4.82151	6.82475	3.67144	4.55748	5.78582
GSM1854928	0.427119	5.02203	4.45099	6.12894	3.25996	4.69086	6.09974
GSM1854929	0.395848	5.55851	4.59259	6.74199	3.71965	4.81902	6.41462
GSM1854930	0.179346	6.05711	4.07019	6.15937	3.5949	4.07038	6.21975
GSM1854931	0.345631	5.12476	4.63533	6.65431	3.51572	4.37887	6.41827
GSM1854932	0.354689	4.65935	4.54749	6.17309	2.94375	4.2501	6.02442
GSM1854933	0.783714	6.62664	5.0345	6.31996	3.67107	6.26473	5.71216
GSM1854934	0.405187	6.16183	5.17576	6.72793	3.57171	4.55224	6.47271
GSM1854935	0.506174	5.38186	4.26246	5.52047	3.99111	4.52432	6.34597
GSM1854936	0.151176	7.32277	5.1892	6.37023	3.04291	4.56447	7.37017
GSM1854937	0.404147	5.50798	4.1335	6.31996	3.57365	4.76115	5.64581
GSM1854938	0.841609	3.58863	4.8663	7.50831	4.96643	5.14261	6.18372
GSM1854939	0.298251	6.74429	4.96384	7.28544	3.26982	5.18399	6.30541
GSM1854940	0.112198	5.81325	4.76163	7.27906	3.67183	3.42539	6.28567
GSM1854941	0.31326	6.16573	4.665	6.39177	3.6222	4.84215	7.07282
GSM1854942	0.237892	6.21581	4.5715	7.04768	3.72091	4.17548	5.94852
GSM1854943	0.59014	5.29053	5.41797	6.64453	3.61258	4.69518	6.42773
GSM1854944	0.580802	4.97737	4.64194	6.07508	3.21396	5.41215	6.2412
GSM1854945	0.119082	6.09712	4.17377	7.28472	3.37314	4.45546	5.83292
GSM1854946	0.426589	7.14663	4.76056	6.15646	3.9039	5.12742	6.67866
GSM1854947	0.36871	7.46581	4.51507	5.53294	3.21351	4.96128	5.87209
GSM1854948	0.313786	6.42573	4.14332	5.69165	3.4553	5.33695	7.0674
GSM1854949	0.337721	5.62524	4.41557	6.48333	2.89253	5.43678	6.41462
GSM1854950	0.325474	5.64479	4.47618	6.05364	3.26467	5.19359	7.32261
GSM1854951	0.278238	5.73639	3.96453	6.47664	3.58637	5.57883	7.16668
GSM1854952	0.481507	5.93527	4.3075	6.23783	3.41485	5.45933	5.86531
GSM1854953	0.330229	6.8469	4.47664	6.69818	3.20756	6.13705	6.89482
GSM1854954	0.398245	5.67478	4.227	6.24598	3.5664	5.07611	6.26975
GSM1854955	-0.0199521	7.35732	4.62334	7.02239	3.87792	4.03699	7.4063
GSM1854956	0.478794	6.36186	5.09451	5.45026	3.80142	4.30088	6.98539
GSM1854957	0.226349	5.9245	4.28597	6.00353	3.44264	4.49356	6.89962
GSM1854958	-0.0280349	6.28556	4.19804	7.10354	3.57567	4.01196	6.84616
GSM1854959	0.403385	5.23261	4.77183	6.85107	3.61939	4.54789	6.30061
GSM1854960	0.26846	4.59738	4.78142	7.05535	3.59652	4.26529	7.25075
GSM1854961	0.0639209	6.99997	4.4266	6.24988	3.65495	3.91005	6.94727
GSM1854962	0.0492175	6.29536	4.47169	7.08448	3.43606	4.25171	6.8929
GSM1854963	0.573288	7.35611	5.23326	7.44768	4.24787	5.4231	5.71942
GSM1854964	0.238957	6.63417	4.98016	6.80461	3.68506	3.81777	6.16359
GSM1854965	0.719837	4.62146	4.958	6.68678	3.9986	4.6111	5.34574
GSM1854966	0.208679	5.5513	4.57358	6.4907	3.34881	4.14256	6.71696
GSM1854967	0.292165	6.40994	4.31697	6.77526	4.31556	4.26816	6.17125
GSM1854968	0.490384	3.5073	4.40188	6.34708	3.63157	4.4597	6.59143
GSM1854969	0.592141	4.48799	4.74739	6.29426	3.79004	4.42941	5.96068
GSM1854970	0.146679	4.36606	4.08076	6.2682	3.14193	4.17548	7.11927
GSM1854971	0.275037	5.98944	4.83219	6.54167	3.04291	4.89152	6.88947
GSM1854972	0.38561	5.24647	4.33522	6.08519	3.70959	4.49932	6.49809
GSM1854973	0.393963	5.3246	4.56612	5.56557	3.08001	4.54361	6.53991
GSM1854974	0.492613	4.62562	5.25147	6.39957	3.20756	4.16485	6.32963
GSM1854975	0.140557	4.49322	4.71085	6.61598	3.05714	3.71384	7.16714
GSM1854976	0.60011	6.16973	5.01298	6.75935	4.01075	4.951	5.70496
GSM1854977	0.282833	5.86819	4.69612	6.53585	3.67952	4.1588	6.57625
GSM1854978	0.444118	5.34158	4.83269	6.02115	3.76294	4.03737	6.44064
GSM1854979	0.260523	6.41326	4.61548	6.76485	3.91745	4.23178	6.39287
GSM1854980	0.191219	4.74395	4.05823	6.48562	3.94015	3.89184	6.97321
GSM1854981	0.714303	2.97924	4.39659	6.16309	4.24271	4.96081	6.9397
GSM1854982	0.528407	5.56178	5.06709	7.1196	3.74625	4.88232	5.96233
GSM1854983	0.04317	7.94395	4.70167	7.42552	3.57445	4.33653	6.1136
GSM1854984	0.555922	4.83183	4.59163	5.95304	3.74585	5.05469	6.88712
GSM1854985	-0.0916477	6.1737	3.92507	7.43283	3.65178	4.45888	7.27878
GSM1854986	0.200975	5.23177	4.37811	7.21908	3.1995	4.75303	6.43759
GSM1854987	0.280445	5.58076	4.17887	6.1332	4.14023	4.59254	7.52706
GSM1854988	0.456924	4.92112	4.84034	6.00702	3.66429	4.28351	6.87582
GSM1854989	0.0447061	8.46652	4.84138	6.69165	3.46745	4.32386	6.64095
GSM1854990	0.384139	5.5732	5.1459	7.02754	3.63564	4.513	6.72841
GSM1854991	0.0775961	6.63651	4.55763	7.69397	3.26039	4.63455	6.16024
GSM1854992	0.338047	4.92908	4.73065	6.23062	3.32051	4.37313	6.99573
GSM1854993	0.268976	7.70719	5.28754	6.82098	3.79202	4.35156	6.61573
GSM1854994	0.178839	5.47772	4.46583	6.62001	3.32712	4.57148	7.22532
GSM1854995	0.503942	4.22974	5.03197	6.39677	3.30822	4.85693	7.21384
GSM1854996	0.473	6.41678	4.76723	6.21924	3.82413	5.13402	6.6706
GSM1854997	0.0421969	7.65981	4.46098	6.85107	3.84441	4.18922	6.69869
GSM1854998	0.436093	7.38017	5.16339	6.59709	3.48096	4.93823	5.83627
GSM1854999	0.388533	5.88916	4.97494	6.82986	3.68789	4.75704	6.75798
GSM1855000	0.0789249	7.23724	4.76473	6.94389	2.91597	4.6041	6.40463
GSM1855001	0.490459	5.85784	5.01708	6.34427	3.51488	4.69175	6.21975
GSM1855002	0.49935	4.27293	4.89188	5.56557	3.35472	4.70559	7.73628
GSM1855003	0.155471	5.89022	4.21704	6.6526	3.54174	4.56707	6.8929
GSM1855004	0.297762	6.68399	4.49697	6.72975	3.20375	4.95057	5.62584
GSM1855005	0.592686	5.9186	5.03299	6.21788	3.49454	5.15163	6.11465
GSM1855006	0.264451	5.82669	4.21799	6.24073	3.81892	4.28596	6.52499
GSM1855007	-0.182076	5.69212	4.37907	7.40375	2.8416	4.26816	7.8489
GSM1855008	0.358492	4.74938	4.65148	6.18518	3.3914	4.51432	7.15683
GSM1855009	0.442109	5.89814	4.59455	6.64859	3.53162	4.78236	5.55598
GSM1855010	0.430504	6.84734	4.95133	6.7038	3.41861	5.15781	5.95018
GSM1855011	0.350838	5.09642	4.41189	7.13106	3.38724	5.01702	6.11306
GSM1855012	0.267855	4.70845	4.85848	7.72019	3.00991	4.28997	5.73555
GSM1855013	0.435128	5.06457	4.56163	6.33218	3.22254	4.26698	5.34461
GSM1855014	0.133916	6.68586	4.57203	6.74677	3.39797	4.26487	6.44324
GSM1855015	0.145257	4.94724	4.19615	6.25725	3.42937	4.12417	7.29771
GSM1855016	0.448252	6.63089	4.58001	5.65624	3.00678	4.85647	5.37063
GSM1855017	0.702243	3.10559	4.46729	8.10371	6.5133	4.59878	7.77844
GSM1855018	0.321982	6.31772	4.43857	5.77046	3.26639	4.42985	6.02988
GSM1855019	0.167962	5.96778	4.2022	6.37622	3.36898	4.40237	6.52599
GSM1855020	0.352461	5.99531	4.50039	5.30511	3.43606	4.63676	7.20842
GSM1855021	0.448908	6.32019	4.77235	5.85113	3.4863	4.55611	6.05585
GSM1855022	0.314206	5.28588	4.49989	6.28868	3.04508	4.36107	5.97399
GSM1855023	0.375843	7.14448	4.79634	6.47256	3.76257	4.80819	6.15806
GSM1855024	0.561117	5.49071	4.52934	5.21124	3.2728	4.90296	6.14831
GSM1855025	0.884928	4.49165	5.07497	6.27444	3.57326	5.59453	5.5136
GSM1855026	0.742234	4.54402	4.93308	5.81019	3.41403	5.36248	6.33549
GSM1855027	0.714738	3.90363	4.93977	6.98729	3.97048	4.87111	5.86868
GSM1855028	0.310426	7.1822	5.01602	6.72575	3.73064	4.85225	6.83792
GSM1855029	0.255976	7.13107	5.31696	7.2252	3.21396	4.42572	5.99614
GSM1855030	0.646413	4.98344	5.52318	6.6086	3.0827	5.00713	6.0861
GSM1855031	0.0927595	6.42526	4.29203	6.49992	3.25395	4.35363	6.60775
GSM1855032	0.633858	6.05075	5.14481	5.71743	3.79903	4.21561	5.60891
GSM1855033	0.0046145	5.57082	4.52296	7.69597	3.0149	4.40104	6.79446
GSM1855034	0.285564	5.75474	4.6343	6.37799	3.47151	4.376	6.68626
GSM1855035	0.371631	5.97711	4.67812	6.13807	3.47804	4.7413	6.68626
GSM1855036	0.199777	6.50083	4.94462	5.62894	3.01211	4.18032	7.34598
GSM1855037	0.281148	7.88693	5.18973	5.89983	3.22847	4.60756	6.74249
GSM1855038	0.569487	6.02411	5.03036	6.22306	3.36552	4.73911	5.44796
GSM1855039	0.495958	5.81764	5.65396	7.50046	3.18502	5.00998	6.12169
GSM1855040	0.335002	6.93885	4.67964	5.31921	3.03618	4.23548	5.834
GSM1855041	0.310479	6.64322	4.64194	6.50592	3.66265	4.59966	6.28676
GSM1855042	0.185493	6.32862	4.46386	5.97337	3.5961	4.11582	7.02665
GSM1855043	0.392611	7.1586	4.63888	5.77817	3.63115	4.49145	5.83955
GSM1855044	0.129272	5.77529	4.57852	7.1196	3.21222	4.61688	6.96706
GSM1855045	0.216983	5.58461	4.4984	5.94765	3.12935	4.32673	7.01627
GSM1855046	0.178862	6.94958	4.49265	6.4382	3.6069	3.79851	5.7244
GSM1855047	0.397254	7.37608	5.48306	6.60727	3.62301	4.54153	6.44428
GSM1855048	0.76645	3.34301	6.0714	7.0948	3.03443	4.19855	5.65595
GSM1855049	0.9776	2.19133	5.00701	5.65333	3.7374	4.99824	6.43654
GSM1855050	0.542051	4.69454	4.71994	6.13465	3.36052	4.88002	6.33602
GSM1855051	0.00146777	8.07821	4.59307	6.75374	3.46786	4.41588	6.85246
GSM1855052	0.435127	5.55654	4.70271	5.92083	3.55503	4.34115	6.32342
GSM1855053	0.279206	6.49733	5.16073	8.11762	3.43819	5.15964	6.31768
GSM1855054	0.473392	4.93173	4.55815	5.48869	3.46535	4.49668	6.755
GSM1855055	0.387608	5.6554	4.52682	5.90072	3.2825	4.65254	6.34396
GSM1855056	0.260991	7.31278	4.92632	6.33874	3.73623	4.89607	7.47759
GSM1855057	0.207004	6.89146	4.52296	6.64501	3.55503	4.4521	6.19784
GSM1855058	0.366436	6.4767	4.2341	6.35174	3.69313	4.73589	5.54419
GSM1855059	0.329992	5.84359	5.33374	6.99726	3.52435	4.15839	6.72238
GSM1855060	0.217354	6.76471	4.66696	6.54651	3.43819	4.25293	6.15204
GSM1855061	0.200469	5.68106	4.35	5.86329	3.08445	4.51949	7.08297
GSM1855062	0.506208	5.95999	5.20197	6.58176	3.29256	4.53682	5.5655
GSM1855063	0.184628	7.03604	5.02233	5.46085	3.1458	4.71401	8.36283
GSM1855064	0.659025	4.51395	5.07224	5.83991	3.51236	4.56493	6.32285
GSM1855065	0.485802	5.35152	4.78914	6.42213	3.12103	4.76657	5.61007
GSM1855066	-0.0226215	6.82746	4.31697	6.03391	3.02208	4.10537	7.14637
GSM1855067	0.40913	5.62133	4.79789	5.8083	3.46332	4.34779	6.67965
GSM1855068	0.381954	6.20541	4.8352	6.45618	4.00133	3.95246	6.06307
GSM1855069	0.776827	3.60682	5.14118	6.38769	3.5039	4.68632	5.69926
GSM1855070	0.0463955	5.7641	3.19257	5.79529	3.49693	4.71709	6.95814
GSM1855071	0.349787	6.46915	4.94462	6.15359	3.56079	4.70828	7.09179
GSM1855072	0.103	7.23168	4.43616	5.82421	2.69379	4.57104	6.44016
GSM1855073	0.480057	5.56377	4.71896	5.62515	3.4863	4.84539	6.91425
GSM1855074	0.204962	7.51812	4.34228	6.5236	3.83377	4.68632	6.26805
GSM1855075	0.517605	4.40679	5.2919	6.80503	3.06723	4.71667	6.47062
GSM1855076	0.70378	4.16848	4.96749	5.77572	3.5538	4.76611	6.41619
GSM1855077	0.241269	6.42195	4.68114	6.40324	3.39504	4.22351	6.29375
GSM1855078	0.719881	6.53412	4.99003	5.83455	3.8876	4.98214	5.29922
GSM1855079	0.0141113	7.42533	4.24006	7.03518	3.38644	4.55656	6.28783
GSM1855080	0.387134	3.42572	4.35715	6.34944	3.2527	4.38661	6.748
GSM1855081	0.32552	5.07223	4.18442	6.56675	3.28171	4.9831	6.31922
GSM1855082	0.123885	5.20659	4.26711	6.48562	3.04817	4.37719	6.95009
GSM1855083	0.257908	6.10304	4.63225	7.38789	3.66946	4.47101	5.94024
GSM1855084	-0.26938	7.1424	4.58864	6.93568	2.62115	3.56948	7.1321
GSM1855085	0.0158751	5.55275	4.24811	7.38091	3.51736	3.83257	6.47741
GSM1855086	0.408001	6.9455	5.30431	7.24768	3.84251	4.79008	6.27188
GSM1855087	0.0762958	5.22769	4.04966	6.17122	3.0957	4.61025	7.64652
GSM1855088	0.344407	5.16951	4.82703	5.84722	3.43287	4.02551	7.07054
GSM1855089	0.168904	5.65396	4.57852	6.08242	3.24103	4.07918	7.1911
GSM1855090	-0.378181	7.59755	4.49317	6.68763	2.63629	3.93141	8.31224
GSM1855091	0.503124	4.39523	4.85745	7.04811	3.61383	4.80953	6.4041
GSM1855092	0.188104	6.1737	4.58106	7.10943	3.72982	4.68908	7.07282
GSM1855093	0.197736	6.1737	4.88462	6.75459	3.35214	4.34945	6.9604
GSM1855094	0.0562259	7.08062	4.34416	5.98076	3.18668	4.20998	6.8108
GSM1855095	0.184762	6.19188	4.61401	6.95899	3.82491	4.6236	7.37281
GSM1855096	0.568478	6.33997	5.09762	6.97772	4.2419	4.82909	5.93692
GSM1855097	0.276421	6.16679	4.91744	7.23278	3.3942	4.66679	6.34597
GSM1855098	-0.297992	6.00432	3.88004	7.83806	3.25139	3.99738	7.32431
GSM1855099	0.276105	7.47263	4.90542	6.52716	3.83055	4.72471	6.88025
GSM1855100	0.343542	7.14663	5.16447	6.48424	3.07382	5.10159	6.52712
GSM1855101	0.215119	4.24027	3.9948	6.70919	3.61861	4.27698	6.83024
GSM1855102	0.484908	5.42533	4.96222	5.9218	3.30014	4.70291	6.65047
GSM1855103	0.392592	5.74573	4.3686	6.2933	3.79475	4.94921	6.65597
GSM1855104	0.597953	5.20378	6.30601	6.97162	3.31587	4.52777	7.15221
GSM1855105	0.234898	5.89958	4.81473	6.34519	3.12315	4.61329	7.20659
GSM1855106	0.627677	4.5473	4.88986	5.93985	3.54979	4.53514	6.09548
GSM1855107	0.337408	5.07267	4.87213	6.83495	3.40632	4.2488	6.44837
GSM1855108	-0.513408	8.39497	3.75428	6.95533	2.69204	4.15751	7.46225
GSM1855109	0.417135	4.4554	4.51405	7.13379	3.17849	4.98034	5.87931
GSM1855110	0.396087	5.57277	4.71944	6.67136	3.35514	4.81176	6.18057
GSM1855111	0.298916	6.27709	5.25687	6.96471	3.36898	4.4478	6.71298
GSM1855112	0.322876	5.961	5.10824	6.53405	3.40871	4.87719	7.59921
GSM1855113	0.0188055	5.56419	4.19851	6.82564	3.85836	4.13677	7.9064
GSM1855114	0.133929	6.59972	4.74841	6.34853	2.94968	4.75303	7.32178
GSM1855115	0.539087	5.72422	4.69162	6.30553	4.8153	4.44343	6.90474
GSM1855116	-0.258589	8.48774	4.54898	7.42766	3.03095	4.13474	6.80788
GSM1855117	-0.0361647	8.24759	4.46583	6.55782	3.36683	4.39597	6.82679
GSM1855118	0.24259	3.71385	4.62334	8.23639	3.13933	4.70516	6.4078
GSM1855119	0.267616	7.22191	4.81523	6.75459	3.39965	5.02999	6.48459
GSM1855120	0.641636	3.40948	4.92107	6.91434	3.73502	4.98079	6.68925
GSM1855121	0.374233	6.51007	5.20785	6.31621	3.61665	4.45035	6.92292
GSM1855122	-0.245027	8.65024	4.28694	6.07998	3.05488	4.18558	7.67976
GSM1855123	0.124475	5.44223	4.47514	7.05733	3.3992	4.05501	6.61271
GSM1855124	0.654529	3.37231	5.00433	6.86077	3.80932	4.9146	6.85494
GSM1855125	0.496196	5.63191	5.22686	7.50508	3.61258	4.62625	5.50298
GSM1855126	0.481565	5.13103	5.2343	7.46277	3.63481	4.84311	6.39613
GSM1855127	0.138047	6.18355	4.16111	5.97538	3.53241	4.50241	7.36717
GSM1855128	0.0586673	6.61277	3.63838	7.13223	5.09652	4.10453	7.13492
GSM1855129	0.026383	6.07846	4.33948	6.54514	3.10303	4.25376	7.0946
GSM1855130	0.127394	7.32743	4.44948	6.51627	3.83175	4.13719	6.50394
GSM1855131	0.00170981	5.63474	4.24285	6.95448	3.10001	4.37313	7.13725
GSM1855132	0.519906	5.2516	4.94883	6.57297	3.9114	4.66273	6.5844
GSM1855133	-0.00388753	5.46256	3.98498	6.40137	3.16845	4.06219	7.08945
GSM1855134	0.146238	5.34249	4.16866	6.56855	3.54174	4.17092	6.82204
GSM1855135	0.553272	4.24063	4.74431	6.77904	3.75695	4.71445	6.2627
GSM1855136	0.182235	6.04578	4.83681	7.97108	2.82644	4.90675	5.71046
GSM1855137	0.220576	5.69212	4.46341	7.09796	3.20549	4.58801	6.01734
GSM1855138	0.190802	6.85796	4.82402	6.96274	3.77679	4.27194	6.67769
GSM1855139	0.277975	5.15522	4.27144	6.26724	3.68229	4.17749	6.63432
GSM1855140	0.169345	5.75672	4.26005	6.46162	3.62421	4.00837	6.52083
GSM1855141	-0.0221063	6.34744	4.83628	7.52789	3.39965	4.22475	7.57927
GSM1855142	0.24119	6.50083	5.09502	7.1793	3.18106	4.51259	6.26975
GSM1855143	0.186343	5.05202	4.4266	6.32472	3.36343	4.29547	7.4037
GSM1855144	0.0530648	8.15857	4.96061	7.12714	4.23513	4.31304	7.67776
GSM1855145	0.0950659	7.34051	4.69917	6.92377	3.50548	4.19397	6.39238
GSM1855146	0.0769173	8.34229	4.76004	6.09334	3.20673	4.43491	6.74596
GSM1855147	0.0588282	6.00131	4.68719	6.89755	3.10435	4.05822	6.90752
GSM1855148	0.389168	3.40908	3.91435	6.5222	3.75493	4.59743	6.70989
GSM1855149	0.364817	5.07969	4.50719	5.80245	3.36052	4.37397	6.76038
GSM1855150	0.374095	5.57082	4.88259	6.51806	3.40173	4.53897	6.55065
GSM1855151	0.0226629	6.2785	4.32808	6.78251	3.82087	4.20998	7.69573
GSM1855152	0.336886	6.92761	4.59849	6.20175	3.70527	4.94554	6.65992
GSM1855153	0.0520131	7.83988	4.51609	6.42118	3.50188	4.47565	6.9675
GSM1855154	0.481585	5.7389	4.94932	6.04068	3.34963	4.8532	6.56843
GSM1855155	0.316171	7.65301	4.4084	6.22775	4.33292	4.35859	5.99892
GSM1855156	0.446628	6.21345	4.84447	5.98525	3.41571	4.60583	6.11082
GSM1855157	0.404932	5.79576	4.71532	6.52941	3.11757	4.41588	5.18533
GSM1855158	-0.185255	7.17444	4.29203	7.74905	3.59211	4.69128	7.91911
GSM1855159	0.168118	6.22069	4.75193	7.14191	3.30101	4.64435	6.80496
GSM1855160	0.330991	5.84607	4.93619	6.05727	3.24103	4.31502	6.77667
GSM1855161	0.189605	5.92099	4.29347	6.28203	3.3752	4.16404	6.34597
GSM1855162	0.190734	5.88119	4.7219	6.78813	3.09866	4.72379	7.01905
GSM1855163	0.727314	2.38689	4.55965	6.22636	3.72459	4.8486	6.59691
GSM1855164	0.247818	5.65443	4.44995	6.89885	3.30191	4.67227	6.27933
GSM1855165	0.197316	7.74243	4.91637	7.003	3.46619	4.63275	6.14443
GSM1855166	0.350653	5.14918	4.62527	6.47619	3.22847	4.53851	6.33396
GSM1855167	0.34363	6.81806	5.31377	6.57297	3.58385	4.4765	6.85595
GSM1855168	0.22126	6.40899	4.88566	5.85402	3.13977	4.32851	7.26255
GSM1855169	0.521567	4.74857	4.86312	5.40484	3.76294	3.93842	6.85881
GSM1855170	0.449656	7.24527	5.0298	5.24222	3.16887	4.52559	6.04466
GSM1855171	0.725999	3.03821	4.48931	4.61646	3.47846	3.94473	6.16854
GSM1855172	-0.128273	7.88693	4.43857	6.42725	3.27796	3.85979	7.06924
GSM1855173	0.216384	7.38017	5.40375	6.08941	3.10789	4.68196	7.7932
GSM1855174	0.216679	5.68583	4.73321	6.89885	3.345	4.47397	6.86567
GSM1855175	0.291651	5.42107	4.80606	7.18738	3.48216	4.2488	6.15152
GSM1855176	0.237052	6.16333	4.75903	6.63059	3.1411	4.6111	6.58287
GSM1855177	0.223463	5.11978	4.55413	6.14003	3.44302	4.39726	7.76951
GSM1855178	0.199035	7.7342	5.22577	6.12554	3.28712	4.33233	7.05629
GSM1855179	0.467828	6.86587	5.52265	6.5123	3.30577	4.63586	6.08442
GSM1855180	0.454339	4.61388	4.88566	6.60945	3.64735	4.46979	6.7717
GSM1855181	0.392007	5.88516	4.8695	5.96612	3.13846	4.68017	6.56947
GSM1855182	-0.0691929	7.2051	4.60545	7.72357	3.87635	3.83103	6.81032
GSM1855183	0.376964	5.88765	4.92368	6.598	4.32322	3.64485	6.4078
GSM1855184	0.169506	6.18251	4.50961	7.1446	3.17275	4.81769	6.38668
GSM1855185	0.370885	5.50608	5.3397	6.76399	2.81235	4.80633	6.75349
GSM1855186	0.446315	5.92547	5.04763	6.06479	3.51861	4.26529	6.32074
GSM1855187	0.0975163	8.37789	4.50961	5.35679	3.70999	4.32673	7.48052
GSM1855188	-0.138899	6.91168	4.48686	7.08078	2.76087	4.57846	7.47546
GSM1855189	0.384427	7.20296	4.98578	6.2905	3.43095	4.89879	6.25834
GSM1855190	0.288493	6.69523	5.12196	7.06327	3.29128	4.50201	6.06747
GSM1855191	0.284243	3.87707	5.31643	7.70879	2.65195	3.60994	5.66031
GSM1855192	0.0978323	5.83483	4.44948	6.21071	2.75411	4.09205	6.53437
GSM1855193	0.233645	5.20971	5.03806	6.72402	2.25159	4.60983	6.44324
GSM1855194	0.271491	6.50033	4.77492	6.92538	4.14658	3.89882	6.25034
GSM1855195	0.693301	4.1369	5.37133	6.48744	3.33007	4.73998	6.15806
GSM1855196	0.0414596	7.21066	4.75193	6.85107	3.32547	4.18761	6.84282
GSM1855197	0.21387	4.84123	4.25096	6.05703	3.37227	3.93567	6.79494
GSM1855198	0.691079	3.25712	5.15007	6.53167	3.57686	4.28997	6.08002
GSM1855199	0.255769	7.16884	5.21972	6.48562	3.00316	4.4838	6.37715
GSM1855200	0.453362	6.79465	4.68316	5.89021	3.85876	4.74995	6.27029
GSM1855201	0.230217	7.24065	5.48628	7.00979	3.80815	4.39137	7.54711
GSM1855202	0.728282	3.99949	4.958	5.92959	4.12554	4.56098	6.71298
GSM1855203	0.932837	4.7897	4.94462	6.07411	5.60133	4.65254	6.57052
GSM1855204	0.40464	5.84554	4.89753	6.30641	3.72624	4.76916	7.16764
GSM1855205	0.272302	7.32277	4.96436	6.65828	4.21765	4.19646	6.83216
GSM1855206	0.139369	7.36553	5.34194	7.22405	3.2809	4.52432	7.07606
GSM1855207	0.0391388	8.85604	5.05031	8.21709	4.31154	4.55182	6.67007
GSM1855208	0.390476	6.67263	5.00485	5.86809	3.47883	4.66679	6.86517
GSM1855209	0.921269	2.99067	4.76923	4.49839	3.75051	5.845	8.34011
GSM1855210	0.577396	6.40709	4.84447	5.44307	4.0096	4.59166	6.36177
GSM1855211	0.35538	7.83482	5.01863	5.61502	3.24738	5.1997	7.00272
GSM1855212	0.318999	5.11978	4.7362	5.75098	3.46703	3.93104	7.16448
GSM1855213	0.159867	6.87806	4.64555	6.16933	3.5385	3.89141	6.57105
GSM1855214	0.462989	5.62037	4.90963	6.11988	4.31431	4.12256	7.06043
GSM1855215	0.734478	4.52876	4.5686	6.4424	5.074	4.40396	6.10813
GSM1855216	0.397712	5.80797	4.9628	6.20267	4.20534	4.279	7.52998
GSM1855217	0.302048	4.64669	4.34271	5.81311	3.88059	3.89648	7.37145
GSM1855218	0.19607	6.63651	4.4165	6.22916	3.91422	3.82635	6.39666
GSM1855219	0.206898	6.30437	4.59646	6.87474	3.51861	4.19318	6.10707
GSM1855220	0.592015	3.2704	4.95848	6.51853	4.66975	3.89845	7.60699
GSM1855221	0.577754	5.66713	4.81939	5.95821	4.5054	4.6111	7.04565
GSM1855222	0.21247	5.49995	4.42946	5.84678	3.16277	4.01802	6.71148
GSM1855223	0.137782	6.41819	4.27332	6.7559	3.82732	4.24798	6.62186
GSM1855224	0.292703	5.63377	4.64752	5.97686	3.41697	4.50114	7.28983
GSM1855225	0.091264	5.04394	4.49989	7.0873	3.54494	3.97495	7.30554
GSM1855226	0.290416	7.92943	4.52732	5.15437	3.57852	4.45417	6.46266
GSM1855227	0.487354	4.70346	4.97391	7.05176	3.62543	4.73722	6.44942
GSM1855228	0.320376	6.20252	3.89107	6.48468	3.74974	5.11709	5.9133
GSM1855229	0.417808	4.9495	4.90169	5.49823	3.09635	4.7153	7.63124
GSM1855230	0.893649	6.57383	5.98495	5.4342	3.52595	5.41504	6.33124
GSM1855231	1.00352	4.30541	5.1157	5.79083	4.23869	5.14402	5.66031
GSM1855232	0.479752	5.90639	4.85135	5.56269	3.29972	4.45375	6.17016
GSM1855233	0.330751	5.71211	5.27952	6.59304	3.33711	4.03261	6.70688
GSM1855234	0.367683	4.54075	5.00757	6.58666	2.91727	4.61508	6.92632
GSM1855235	0.135295	6.94774	5.07939	6.6526	3.39376	4.13276	7.16358
GSM1855236	0.714979	4.02625	4.69811	6.09979	3.81164	5.11293	6.39613
GSM1855237	0.0661297	7.83553	4.85848	7.02911	3.47026	4.37758	6.66611
GSM1855238	0.434993	7.45977	4.95495	6.11898	4.01816	4.34115	5.8771

## Sheet: Original picture of wb whole fi
Figure 1:SCN9A
Figure 2:SCN9A-GAPDH
Figure 3:CD25
Figure 4:CD25-GAPDH
Figure 5:CD4
Figure 6:CD4-GAPDH
Figure 7:FOXP3
Figure 8:FOXP3-GAPDH
